# Supplementary material for: The phospholipid PI(3,4)P2 is an apical identity determinant
Source: PubMed Central journal article supplement (PMC6262019; doi:10.1038/s41467-018-07464-8), 2018-11-28
Supplement: 41467_2018_7464_MOESM1_ESM.pdf [file 41467_2018_7464_MOESM1_ESM.pdf]

# **The phospholipid PI(3,4)P<sub>2</sub> is an apical identity determinant**

Roman-Fernandez, Roignot *et al.*

## SUPPLEMENTARY INFORMATION.

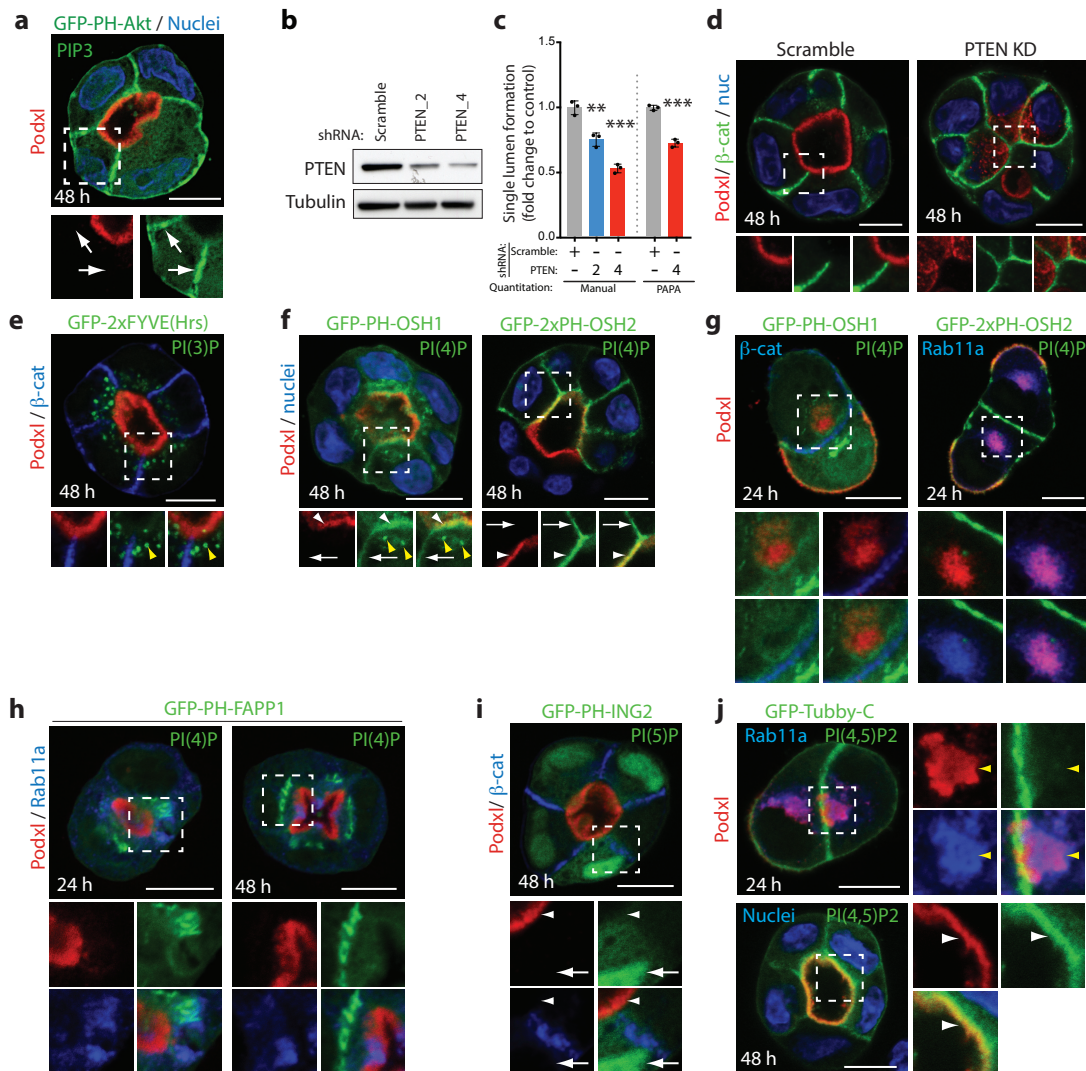

### Supplementary Figure 1. PIP distribution and modifying enzyme expression, related to Figure 1.

(a) PIP<sub>3</sub> [GFP-PH-Akt] basolateral localization (white arrows) in 48h cysts stained for Podxl (red) and nuclei (blue).

(b-d) Effect of PTEN depletion on cyst polarization. (b) Total cell lysates of cells expressing control (scramble) or 2 different PTEN shRNAs, western-blotted for PTEN and tubulin. (c) Manual quantitation of cysts for single lumen formation for above condition, compared to automated quantitation with PAPA (see Supplementary Figure 3). Values are presented as a fold-change over control. Both manual and PAPA analysis: 3 replicates,  $\geq 300$  analysed cysts. *P* value (Student's *t*-



test): \*\* $P \leq 0.005$ , \*\*\* $P \leq 0.0005$ . (d) Control (scramble) or PTEN-depleted cysts were labeled for Podxl (red),  $\beta$ -catenin (green) and nuclei (blue). Note subcortical accumulation of Podxl vesicles upon PTEN KD. In all instances, cysts phenotypes are quantified 48h after plating.

(e) PI(3)P [GFP-2xFYVE(Hrs)] (green, yellow arrowheads) localization in 48H MDCK cysts stained with Podxl (red) and  $\beta$ -catenin (blue).

(f) PI(4)P localization in cysts at 48h stained with Podxl (red) and nuclei (blue), using the alternate probes GFP-PH-OSH1 (left panel) and GFP-PH-OSH2 (right panel) (both green). Note basolateral (arrow) PI(4)P, and apical PI(4)P localization overlapping with Podxl (white arrowheads), and punctate PI(4)P-positive/Podxl-negative (yellow arrowheads) vesicles.

(g) PI(4)P localization in cysts at the vesicular Podxl stage stained with Podxl (red) and either  $\beta$ -catenin (left panel) or Rab11a (right panel) (both blue), using the alternate probes GFP-PH-OSH1 (left panel) and GFP-PH-OSH2 (right panel) [both green].

(h) PI(4)P [GFP-PH-FAPP1] localization in 24h and 48h cysts stained with Podxl (red) and Rab11a (blue).

(i) PI(5)P [GFP-PH-ING2] localization in 48h cysts stained with Podxl (red) and  $\beta$ -catenin (blue). Note nuclear PI(5)P (arrows), and lack of apical PI(5)P (arrowheads).

(j) PI(4,5)P<sub>2</sub> [GFP-Tubby-C] localization in cysts at the indicated stage stained for Podxl (red) and either Rab11a (top) or nuclei (bottom) (both blue). Note co-localization between Rab11a and Podxl vesicles (yellow arrowheads), but not GFP-Tubby-C. White arrowhead, apical PI(4,5)P<sub>2</sub>.

All scale bars, 10  $\mu$ m.

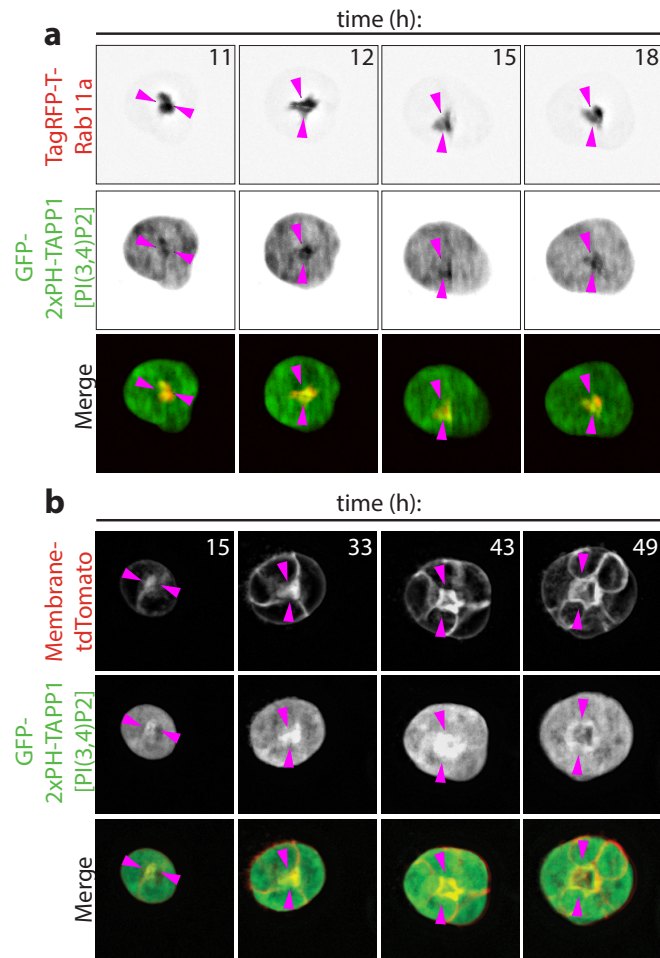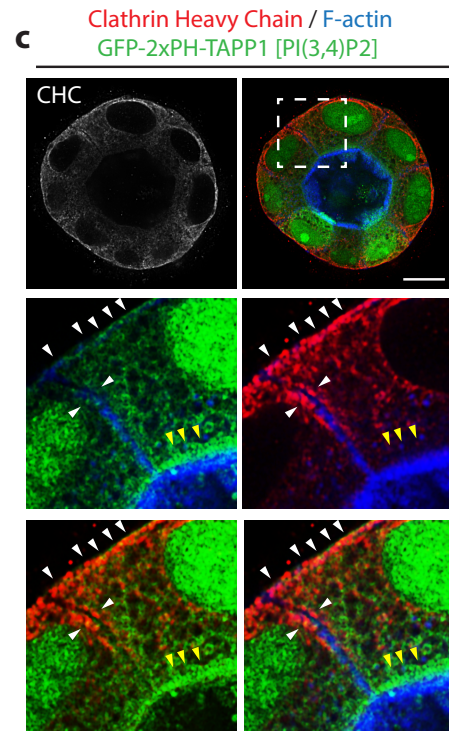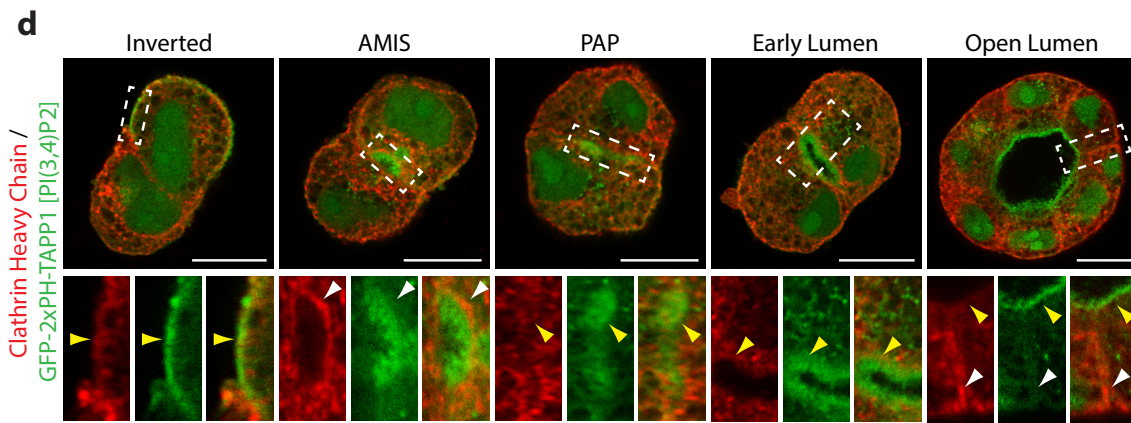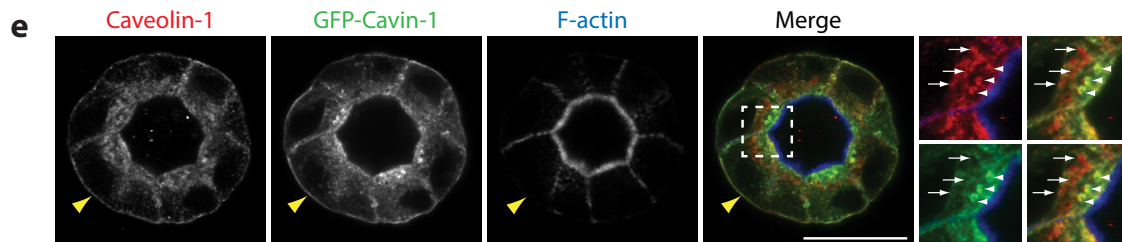

**Supplementary Figure 2. Analysis of PI(3,4)P<sub>2</sub> localization, related to Figure 3.**

(a,b) Time-lapse dual color confocal imaging of cysts expressing EGFP-2xPH-TAPP1 (PI(3,4)P<sub>2</sub>) and either (a) TagRFP-T-Rab11a or (b) Membrane-tdTomato. Images were taken every hour from (a) ~8-24h (b) ~8-52h after plating. Stills are presented from (a) 11-18h or (b) 15-49h. Magenta arrowheads, luminal.

(c,d) Clathrin Heavy Chain (CHC, red) and PI(3,4)P<sub>2</sub> [GFP-2xPH-TAPP1] localization in open lumen cysts (c) and during MDCK cyst formation (d). Yellow arrowheads, luminal or peripheral. White arrowheads, CHC localization.

(e) Caveolin-1 (red), GFP-Cavin-1 (green) and F-actin (blue) in cysts. White arrowheads, dual Caveolin-1/GFP-Cavin-1 vesicles; White arrows, Cavin-1-negative Caveolin-1-positive vesicles. Yellow arrowheads, basal localization of Cavin-1/Caveolin-1.

All scale bars, 10 μm.

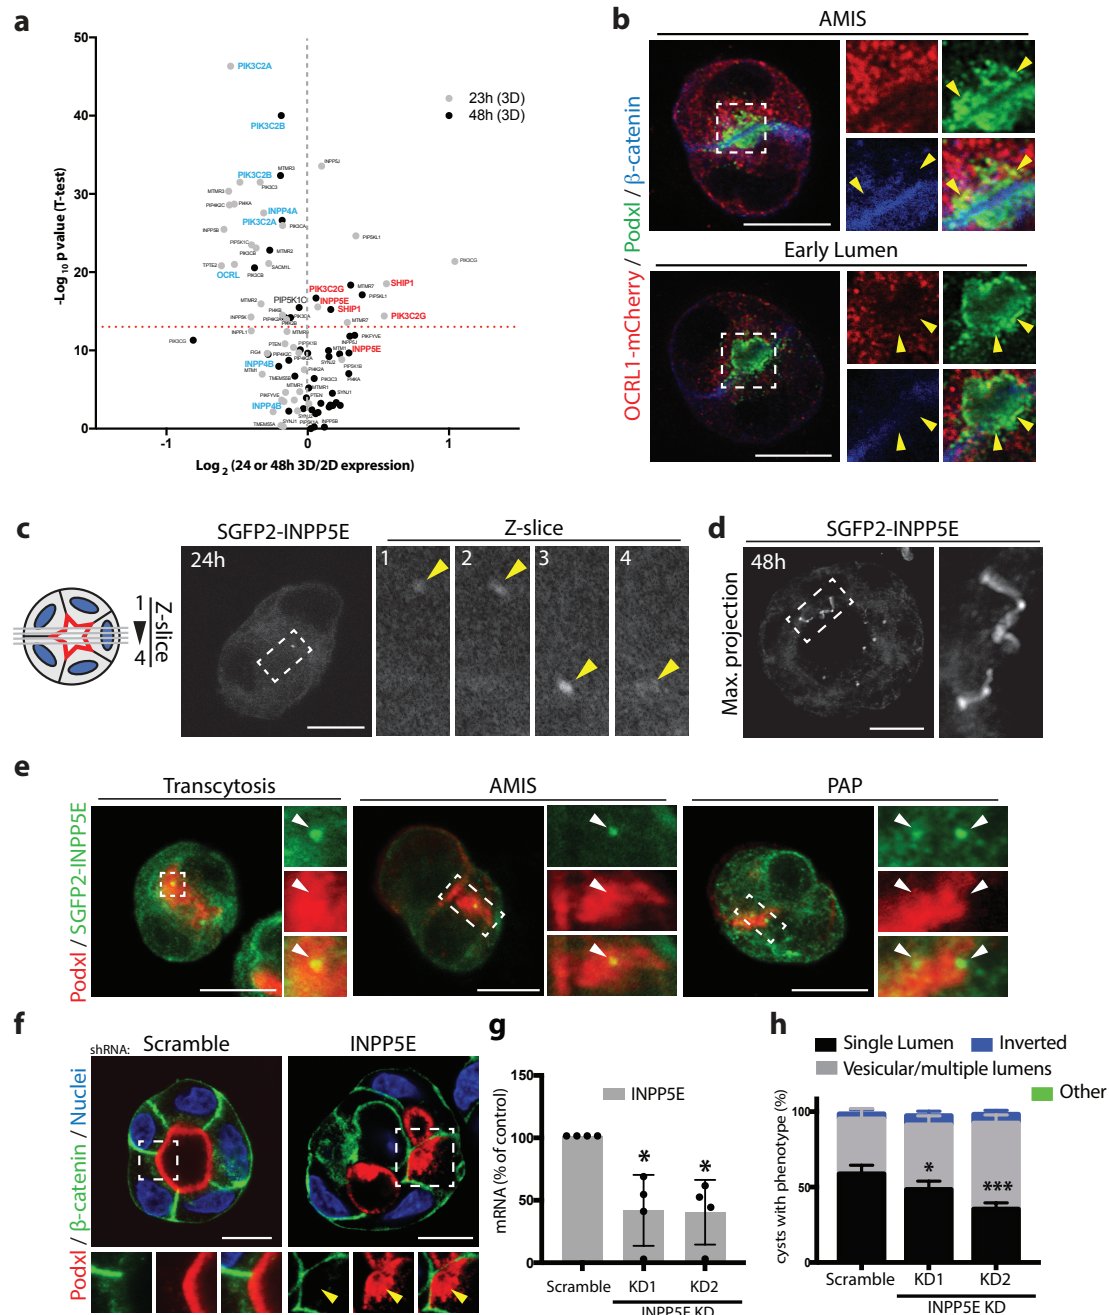

**Supplementary Figure 3. INPP5E contributes to apical domain formation, related to Figure 4.**

(a) Scatter plot comparing PIP-modifying gene expression by qPCR at 23h (grey dots) or 48h (black dots) (X axis,  $\log_2$  expression) to experimental replicate significance (Y axis,  $-\log_{10}$ ). Expression is normalized as fold change compared to 2D expression levels. Red dashed line,  $P$  value (Student's t-test),  $p=0.05$ . Names shown in bold are increased (red) or decreased (blue) potential genes of interest for  $\text{PI}(3,4)\text{P}_2$  regulation.

(b) OCRL1-mCherry (red) localization at AMIS and early lumen stages in cysts stained with Podxl (green, yellow arrowheads) and  $\beta$ -catenin (blue).

(c) SGFP-INPP5E localization at 24h. Right, higher magnification of the boxed region, in sequential Z planes of the medial cyst region, taken at 1.08  $\mu$ M intervals. Yellow arrowheads, INPP5E.

(d) Maximum intensity projection of a confocal stack of SGFP-INPP5E localization images from a cyst at 48h. Right, higher magnification of boxed region.

(e) SGFP-INPP5E (green) localization at vesicular, AMIS and PAP stages. Cysts are stained with Podxl (red). White arrowheads, INPP5E.

(f) Control (scramble) or INPP5E-depleted cysts stained with Podxl (red),  $\beta$ -catenin (green) and nuclei (blue). Yellow arrowhead, vesicular Podxl.

(g) *INPP5E* expression levels in control and INPP5E-depleted cells quantified by RT-qPCR analysis. Mean  $\pm$  s.d., 4 experiments/1 well per experiment. *P* value (Student's t-test): \**P*  $\leq$  0.05

(h) Quantitation of cysts phenotypes upon control (scramble) or INPP5E KD using two independent shRNAs. Mean  $\pm$  s.d.,  $n \geq 300$  cysts assessed from 3 wells/condition/experiment, 5 independent experiments. *P* values (2-way ANOVA): \**P*  $\leq$  0.05, \*\*\**P*  $\leq$  0.0001.

All scale bars, 10  $\mu$ m.



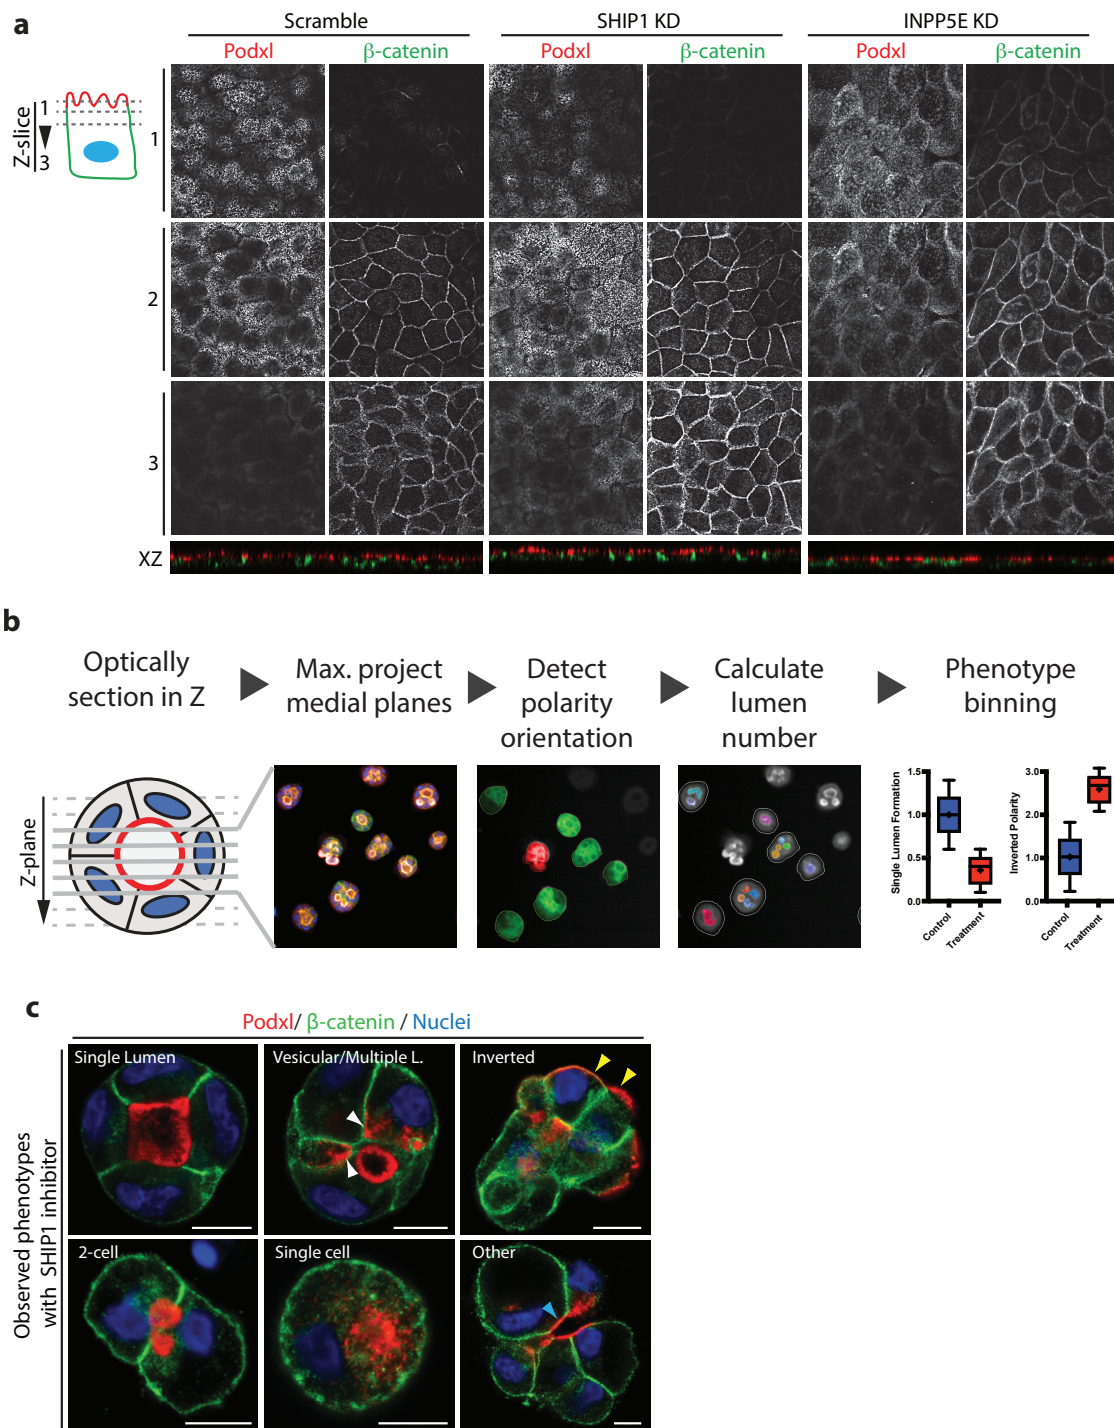

**Supplementary Figure 4. Additional characterization of PIP-modifying enzymes, related to Figure 4.**

(a) (Left) Schematic representation of a polarized, filter-grown epithelial cell. Dashed lines represent the confocal xy section, as indicated. (Right) Podxl or  $\beta$ -catenin staining in filter-grown, polarized MDCK monolayers stably expressing either scramble, SHIP1 or INPP5E shRNAs. (Bottom) XZ projections of confocal slices show apical-basal polarization of monolayers.

(b) Schematic representation of a Pipeline for semi-Automated Polarity Analysis, PAPA. MDCK cysts were cultured in 3D for 24-72h then fixed and stained with Podxl to mark the apical domain, Phalloidin to mark the cortex, Whole Cell Stain to mark cytoplasm and Hoescht to mark the nucleus. Multiple confocal optical sections of MDCK cysts were imaged. A maximum projection of the medial planes was applied, followed by analysis of the resultant images, which includes machine learning to detect polarity orientation based on the localization and intensity of apical markers and the detection and quantification of number of lumens per cyst. Final statistical analysis was performed to calculate percentages of polarity phenotypes, normalized to control, with an example plot presented.

(c) Control or SHIP1-inhibited cysts stained with Podxl (red),  $\beta$ -catenin (green) and nuclei (blue). White arrowheads, vesicular Podxl; yellow arrowheads, peripheral Podxl; blue arrowheads, disruption of cell-cell adhesions. Scale bars, 10  $\mu$ m.



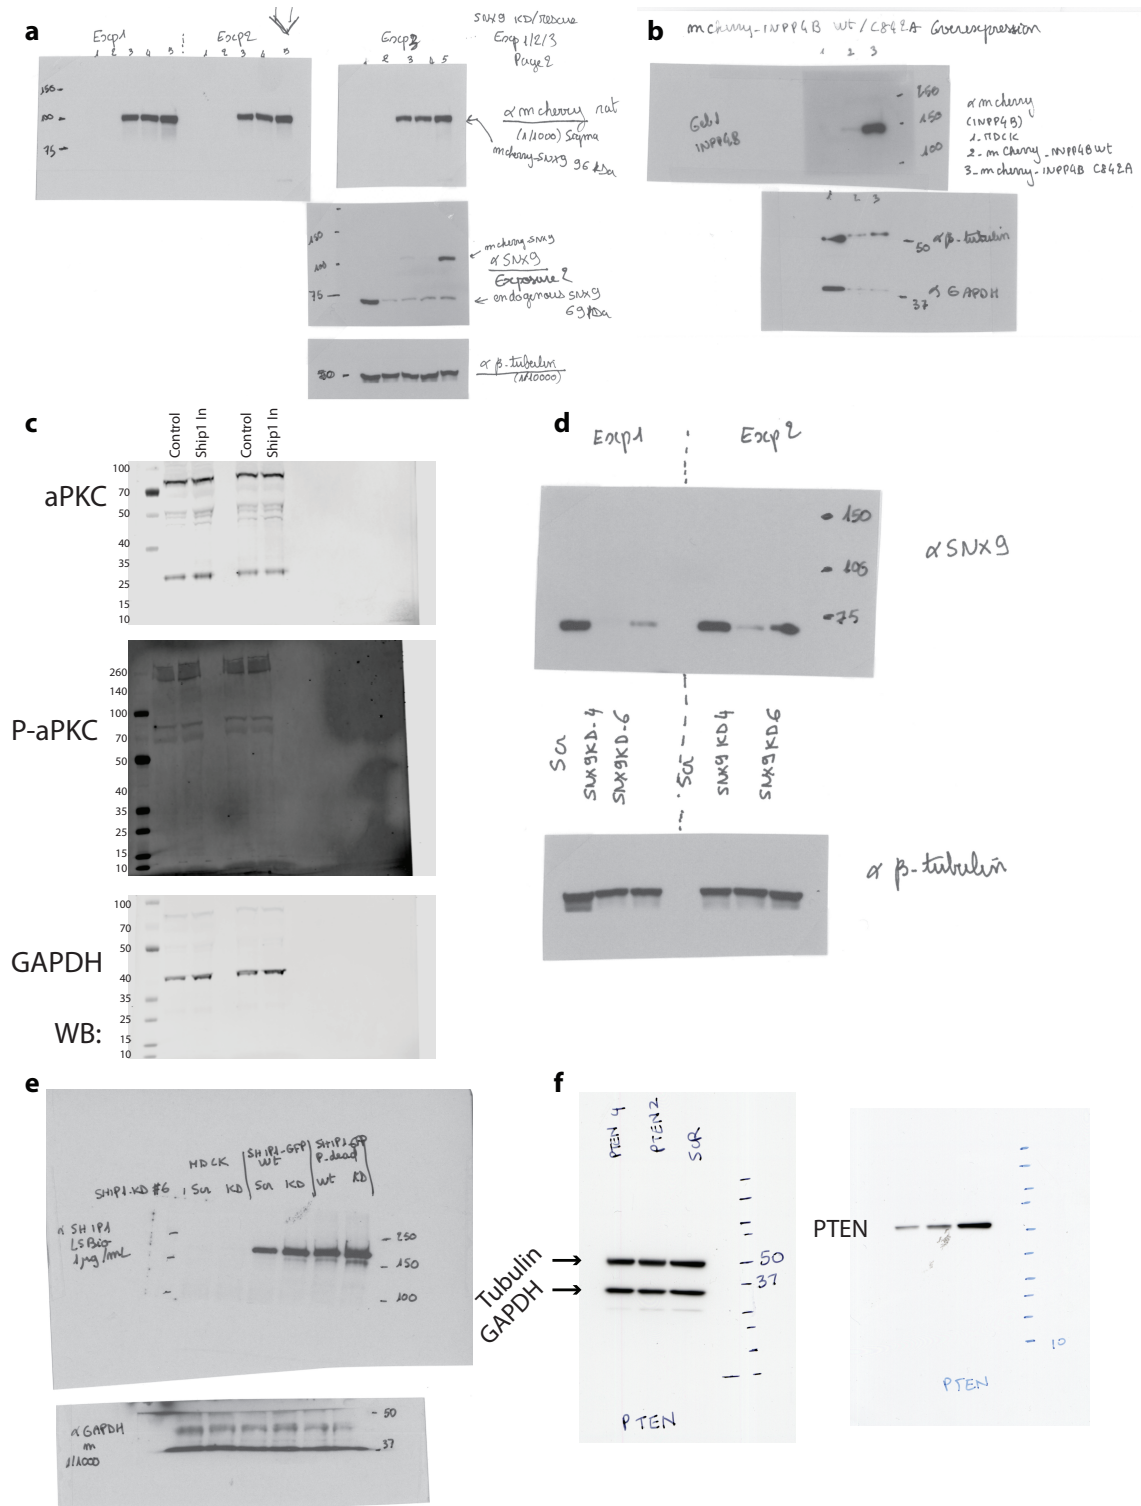

**Supplementary Figure 5. Uncropped Western blots from main figures.**

Uncropped membranes related to (a) Figure 9f; (b) Figure 7a; (c) Figure 8a; (d) Figure 9c; (e) Figure 4f and (f) Supplementary Figure 1.

**Supplementary Table 1. Primary antibodies**

| <b>Protein</b>             | <b>Source</b>     | <b>Catalogue #</b> | <b>Species</b> | <b>Dilution(s)</b>     |
|----------------------------|-------------------|--------------------|----------------|------------------------|
| Acetylated Tubulin         | Sigma             | T-6793             | Mouse          | IF 1:1000              |
| aPKC (C-20)                | Santa Cruz        | sc-216             | Rabbit         | IF 1:200               |
| $\beta$ -catenin           | Santa Cruz        | sc-7199            | Rabbit         | IF 1:200               |
| Caveolin-1                 | BD Biosciences    | 610060             | Rabbit         | IF 1:500               |
| Cherry                     | Life Technologies | M11217             | Rat            | WB 1:500               |
| Clathrin Heavy Chain (X22) | F. Brodsky        |                    | Mouse          | IF 1:1000              |
| GAPDH                      | Millipore         | MAB374             | Mouse          | WB 1:20,000            |
| GAPDH                      | Cell Signaling    | 14C10              | Rabbit         |                        |
| GFP                        | Roche             | 11814460001        | Mouse          | WB 1:3000              |
| GFP                        | Life Technologies | A-11122            | Rabbit         | WB 1:1,000; IP 1:500   |
| Gp135/Podxl                | G. Ojakian        |                    | Mouse          | IF 1:1,000; WB 1:5,000 |
| HA (Y-11)                  | Santa Cruz        | sc-805             | Rabbit         | WB 1:1000              |
| Myc (9B11)                 | Cell Signaling    | 2276               | Mouse          | WB 1:1000              |
| Par3                       | Millipore         | 07-330             | Rabbit         | IF 1:100               |
| PI(3,4)P2                  | Echelon           | Z-P034             | Mouse          | IF: 1:100              |
| Rab11a                     | Invitrogen        | 71-5300            | Rabbit         | IF 1:500               |
| RFP                        | Invitrogen        | R10367             | Rabbit         | WB 1:1000              |
| SHIP1                      | LSBio             | LS-C145498         | Rabbit         | IF: 1 $\mu$ g/ml       |
| SNX9                       | GeneTex           | GTX83599           | Mouse          | IF: 1:100              |

**Supplementary Table 2. RNAi target sequences**

| <b>Target Gene</b> | <b>RNAi Sequence (5' – 3')</b> |
|--------------------|--------------------------------|
| <i>INPP4A_5</i>    | GCTGCCAGTCCATAATCTACA          |
| <i>INPP4B_2</i>    | GCTCATGACACCGTTCAAACC          |
| <i>INPP5E_1</i>    | AAGGTGAGCGAGAGGCTGCTG          |
| <i>INPP5E_2</i>    | AAAGGGTCCATCTTCAAGGGC          |
| <i>PIK3C2A_5</i>   | GCTCAGATATCCAGCAATAAT          |
| <i>PIK3C2B_1</i>   | GGACAGGAAGCCTTGTGAGAA          |
| <i>PIK3C2G_1</i>   | CCTGGAAGCAACAAGTCATTT          |
| <i>PTEN_2</i>      | AATCCACCACAGCTAGAACTT          |
| <i>PTEN_4</i>      | AAACCCGGAGGCTAGCAGTTC          |
| <i>Scramble</i>    | CCGCAGGTATGCACGCGT             |
| <i>SHIP1_1</i>     | AAGGATCTCTATGGCGAAGTC          |
| <i>SHIP1_2</i>     | AAAGACGCGGGATGATTCTGC          |
| <i>SNX9_1</i>      | AATCCCTTCTCTTCCAGATAA          |
| <i>SNX9_2</i>      | AAGCGGGTTGGCACTATGTCT          |

**Supplementary Table 3. RT-qPCR primer list**

| <b>Target</b>         | <b>Primer</b> | <b>Sequence (5' – 3')</b> |
|-----------------------|---------------|---------------------------|
| <i>FIG4</i>           | Fwd           | ACCGCACTAACACAGCACAG      |
|                       | Rev           | CTGGGTCCATGGTGCTATCT      |
| <i>GAPDH</i>          | Fwd           | AGTCAAGGCTGAGAACGGGAAACT  |
|                       | Rev           | CATGGTTCACGCCCATCACAAACA  |
| <i>INPP4A</i>         | Fwd           | CCATCGCTAGATCGAAAACC      |
|                       | Rev           | TCTCCGTCTGTGCATGTTTC      |
| <i>INPP4B</i>         | Fwd           | ATGAGCACCAAGTTGCACAAG     |
|                       | Rev           | ACATTCTCTATGCGGCATCC      |
| <i>INPP4B(2)</i>      | Fwd           | CGGTATTCGTTTCACCTGTTGCA   |
|                       | Rev           | GCACTGCTCAAGAGTCACTGAC    |
| <i>INPP5D (SHIP1)</i> | Fwd           | CCTCTGGAACATCCGAATTG      |
|                       | Rev           | ATGCCGGTCTTCACGTTATC      |
| <i>INPP5E</i>         | Fwd           | AAGCTAAGGCAAAGCCCTTC      |
|                       | Rev           | GCAGGGAGGTAAGCAAGCAG      |
| <i>INPP5J</i>         | Fwd           | TGACCTCGTGTCTGGTTTG       |
|                       | Rev           | GCAAACCTTGACGAAGTGCAG     |
| <i>INPP5K</i>         | Fwd           | AGCACTTTGACCGGATCTTG      |
|                       | Rev           | AAATGCAGCCCAAAGTCCTC      |
| <i>INPPL1</i>         | Fwd           | ATGTGCCTTCATGGTGTGAC      |
|                       | Rev           | ACCTCAAATGTCCCGAACAC      |
| <i>MTM1</i>           | Fwd           | TCCATATCGTGCCTCAGATG      |
|                       | Rev           | TGAATCCATGACAGCACTGG      |
| <i>MTMR1</i>          | Fwd           | GTGGGTCCCAATGATAAACG      |
|                       | Rev           | CGGGCATCGAAGATGATAAG      |
| <i>MTMR2</i>          | Fwd           | GTGGAAAGCGAAGCAAAGAG      |
|                       | Rev           | GCAACAGCATTGACACTTGG      |
| <i>MTMR3</i>          | Fwd           | TGTTTCTGCAGTGGCTTGAC      |
|                       | Rev           | TCCAAACAGGCAGGAATAGG      |
| <i>MTMR7</i>          | Fwd           | TTCCCTGTGCCTTTGAGTTC      |
|                       | Rev           | GTTCTTGTCGCTCCTTTTGG      |
| <i>MTMR9</i>          | Fwd           | CTGGCATTCTTTCTTCCTG       |
|                       | Rev           | GAAGGGCAGACAGCAAATTC      |
| <i>MTMR14</i>         | Fwd           | TCCCTGATTTCTGACTTGC       |
|                       | Rev           | TGTGTTTGTTCACCAGGTC       |

|                |     |                       |
|----------------|-----|-----------------------|
| <i>OCRL</i>    | Fwd | TGGACCGAGGCAAAGATTAC  |
|                | Rev | ATGAGTTTGGTGACGGGAAC  |
| <i>PI4K2A</i>  | Fwd | GCGTTTTGAAGCAGAACCTC  |
|                | Rev | TTGCGGATGATGTAGTCCAG  |
| <i>PI4K2B</i>  | Fwd | CAGCTGGTACAAATGCCTTG  |
|                | Rev | GGAGGAAAAGAATGGCTTCC  |
| <i>PI4KA</i>   | Fwd | CAACCCTGAATGTCATGTCG  |
|                | Rev | CCTGCAGATGTTGTCAATGG  |
| <i>PI4KB</i>   | Fwd | ACTGCAGTCCATTTGGGAAC  |
|                | Rev | TGCCACTGTCAGCAGAAATC  |
| <i>PIK3C2A</i> | Fwd | TGCTGGATGACAGTTTCGAG  |
|                | Rev | GCTGAAAATGAAGGGCTCAG  |
| <i>PIK3C2B</i> | Fwd | GTCATTTTCCGCTGCTTCTC  |
|                | Rev | TTGTGTTTCTGCAGCCAGTC  |
| <i>PIK3C2G</i> | Fwd | TACATGCAGGATTGCCTGAG  |
|                | Rev | TTGTTGCTTCCAGGTCTGTG  |
| <i>PIK3C3</i>  | Fwd | TTCTCCTCCAATGAAGCTG   |
|                | Rev | ACTGTTTGCGGAACTCTTGG  |
| <i>PIK3CA</i>  | Fwd | GCCTCCAATCAAACCTGAAC  |
|                | Rev | GAACAGCAAACCTCGAACC   |
| <i>PIK3CB</i>  | Fwd | CACCAGAACATGAACCATCG  |
|                | Rev | ACAGCCACAATGAGCTTTCC  |
| <i>PIK3CD</i>  | Fwd | TGGAATTCTGGACCAAGGAG  |
|                | Rev | TCTTGATGGTGCTGAGGTTG  |
| <i>PIK3CG</i>  | Fwd | CAACAACTGCGTCTTCATCG  |
|                | Rev | CCTTCTTCTTGGCCATCTTG  |
| <i>PIKFYVE</i> | Fwd | AACAAGCCATGGAGAGGTTG  |
|                | Rev | AATGATGTCCCTCCAAGACG  |
| <i>PIP4K2A</i> | Fwd | TGCCCAGTTAAAGCTCATGG  |
|                | Rev | TTCCCCGTCATTCTCTTCAC  |
| <i>PIP4K2B</i> | Fwd | TCACCAGGAATGTGTTTCAGC |
|                | Rev | TGCCCTTCATTGAGGAAGTC  |
| <i>PIP4K2C</i> | Fwd | TCGAGTTAGCGTGGACAATG  |
|                | Rev | TTCCTTATCGCTGGCTTCTC  |
| <i>PIP5K1A</i> | Fwd | TACCAAACCAGAGCGTGATG  |
|                | Rev | CGAAAGTAACGGAAGGCAAC  |

|                |     |                       |
|----------------|-----|-----------------------|
| <i>PIP5K1B</i> | Fwd | AGATGCCACACCTGGAAAAC  |
|                | Rev | TGGCTTGGGAAGTGAGATTCC |
| <i>PIP5K1C</i> | Fwd | TCATCGACATTCTGCAGTCC  |
|                | Rev | CGGTGTTGCTCATGAACTTG  |
| <i>PIP5KL1</i> | Fwd | TCAAGGCAAGACCATTGACC  |
|                | Rev | TGTAATCGAGCACGTTGAGC  |
| <i>PTEN</i>    | Fwd | CAGTGGCGGAACTTGCAATC  |
|                | Rev | TCGTGTGGGTCCTGAATTGG  |
| <i>SACM1L</i>  | Fwd | CAACCATGTCCTGAATGTGG  |
|                | Rev | TGATCTGCCCTTTCCAAGAG  |
| <i>SNX9</i>    | Fwd | GTGGTAGCAGATCCCAGGAA  |
|                | Rev | GGCTGACCCAACTTAACCA   |
| <i>SYNJ1</i>   | Fwd | TGTGCAGCCATCAAGAAGAC  |
|                | Rev | TGTGGGTGATGCCTTAGATG  |
| <i>SYNJ2</i>   | Fwd | TGCTGGTGACTTTTGCAGAC  |
|                | Rev | TTCGGATGATCTCCTCTTGC  |
| <i>TMEM55A</i> | Fwd | TCAGGCATGACAAAGCAGAG  |
|                | Rev | TAACCACATGCTGGTGAAGC  |
| <i>TMEM55B</i> | Fwd | TCATCTGTGGACACTGCAAG  |
|                | Rev | ATCTGCGCCCAATAGATGAC  |
| <i>TPTE2</i>   | Fwd | CATTGTAAGGGAGGCAAAGG  |
|                | Rev | TTATCTGTTGCGCCGTTCTCC |
